# Supplementary material for: Antibacterial Porous Systems Based on Polylactide Loaded with Amikacin
Source: MDPI journal article supplement (doi:10.3390/molecules27207045), 2022-10-19
Supplement: s1 [file s1]

## Antibacterial Porous Systems based on Polylactide loaded with Amikacin

Marta Glinka<sup>1</sup>, Katerina Filatova<sup>2</sup>, Justyna Kucińska-Lipka<sup>3</sup>, Tomáš Šopík<sup>2</sup>, Eva Domincová Bergerová<sup>2</sup>, Veronika Mikulcová<sup>2</sup>, Andrzej Wasik<sup>1,\*</sup>, Vladimír Sedlařík<sup>2</sup>

<sup>1</sup> Department of Analytical Chemistry, Faculty of Chemistry, Gdańsk University of Technology, 11/12 G. Narutowicza Street, 80-233 Gdańsk, Poland

<sup>2</sup> Centre of Polymer Systems, University Institute, Tomas Bata University in Zlín, Tomáše Bati 5678 Street, 760-01 Zlín, Czech Republic

<sup>3</sup> Department of Polymer Technology, Faculty of Chemistry, Gdańsk University of Technology, 11/12 G. Narutowicza Street, 80-233 Gdańsk, Poland

\* Correspondence: wasia@pg.edu.pl

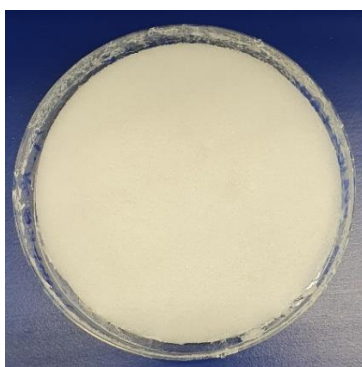

**Figure S1.** Example of fabricated PM material (PLA/PVA).

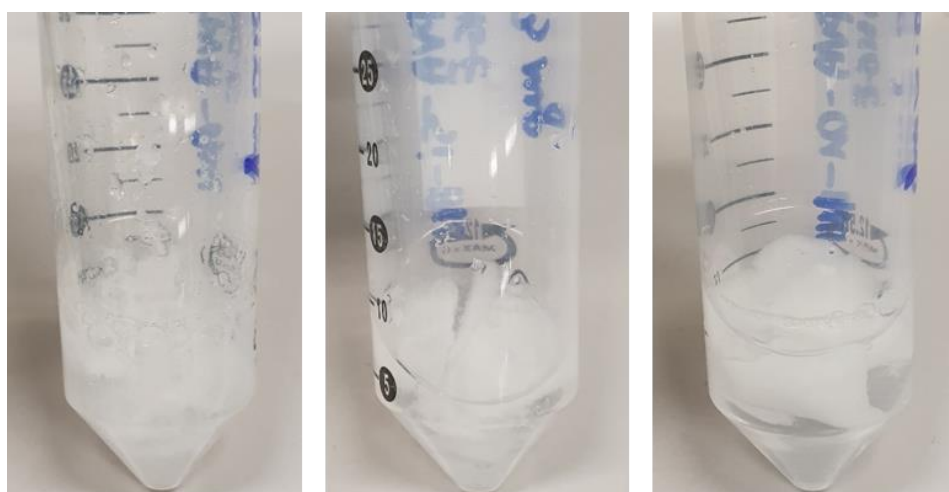

**Figure S2.** Porous matrices after 24 h of immersion in PBS (pH 7.4), 37°C (during “*in-vitro*” release testing): PLA/PVA-AMI (left), PLA/PVA-SiO<sub>2</sub>-AMI (middle), PLA/PVA-CH-AMI (right).

**Table S1.** AMI release from PLA/PVA, PLA/PVA-CH and PLA/PVA-SiO<sub>2</sub> porous matrices. CR and %CR determined using Eq. (3) and (4).

|                 | PM PLA/PVA-AMI     |                            |         | PM PLA/PVA-CH-AMI  |                            |         | PM PLA/PVA-SiO <sub>2</sub> -AMI |                            |         |
|-----------------|--------------------|----------------------------|---------|--------------------|----------------------------|---------|----------------------------------|----------------------------|---------|
| Time, [min]     | %CR $\pm$ SD*, [%] | CR $\pm$ SD, [mg AMI/g PM] | CV, [%] | %CR $\pm$ SD*, [%] | CR $\pm$ SD, [mg AMI/g PM] | CV, [%] | %CR $\pm$ SD*, [%]               | CR $\pm$ SD, [mg AMI/g PM] | CV, [%] |
| 15              | 6.4 $\pm$ 2.0      | 7.7 $\pm$ 2.4              | 31.8    | 31.8 $\pm$ 1.5     | 7.56 $\pm$ 0.35            | 4.6     | 4.22 $\pm$ 0.67                  | 6.7 $\pm$ 1.1              | 15.8    |
| 30              | 7.0 $\pm$ 1.9      | 8.5 $\pm$ 2.3              | 26.8    | 35.5 $\pm$ 1.4     | 8.45 $\pm$ 0.34            | 4.0     | 4.74 $\pm$ 0.78                  | 7.5 $\pm$ 1.2              | 16.5    |
| 45              | 7.7 $\pm$ 1.8      | 9.2 $\pm$ 2.1              | 23.2    | 38.7 $\pm$ 1.8     | 9.21 $\pm$ 0.44            | 4.7     | 5.13 $\pm$ 0.70                  | 8.2 $\pm$ 1.1              | 13.5    |
| 60 (1 h)        | 8.4 $\pm$ 1.7      | 10.1 $\pm$ 2.1             | 20.8    | 41.7 $\pm$ 1.8     | 9.93 $\pm$ 0.43            | 4.4     | 5.53 $\pm$ 0.69                  | 8.8 $\pm$ 1.1              | 12.4    |
| 90 (1.5 h)      | 9.0 $\pm$ 1.7      | 10.8 $\pm$ 2.0             | 18.4    | 44.5 $\pm$ 1.8     | 10.59 $\pm$ 0.42           | 4.0     | 5.89 $\pm$ 0.72                  | 9.4 $\pm$ 1.1              | 12.3    |
| 120 (2 h)       | 9.5 $\pm$ 1.6      | 11.4 $\pm$ 1.9             | 16.7    | 47.0 $\pm$ 1.7     | 11.20 $\pm$ 0.40           | 3.5     | 6.23 $\pm$ 0.74                  | 9.9 $\pm$ 1.2              | 11.9    |
| 180 (3 h)       | 10.0 $\pm$ 1.6     | 12.0 $\pm$ 1.9             | 15.7    | 49.2 $\pm$ 1.7     | 11.72 $\pm$ 0.40           | 3.4     | 6.54 $\pm$ 0.78                  | 10.4 $\pm$ 1.2             | 11.9    |
| 720 (12 h)      | 10.4 $\pm$ 1.6     | 12.5 $\pm$ 1.9             | 15.2    | 51.2 $\pm$ 1.8     | 12.20 $\pm$ 0.43           | 3.6     | 6.84 $\pm$ 0.79                  | 10.9 $\pm$ 1.3             | 11.6    |
| 1440 (1 day)    | 10.7 $\pm$ 1.6     | 12.9 $\pm$ 1.9             | 14.6    | 52.4 $\pm$ 1.9     | 12.49 $\pm$ 0.44           | 3.6     | 7.02 $\pm$ 0.78                  | 11.1 $\pm$ 1.2             | 11.1    |
| 4320 (3 days)   | 11.0 $\pm$ 1.6     | 13.2 $\pm$ 1.9             | 14.2    | 53.5 $\pm$ 2.0     | 12.75 $\pm$ 0.47           | 3.7     | 7.17 $\pm$ 0.76                  | 11.4 $\pm$ 1.2             | 10.7    |
| 5760 (4 days)   | 11.2 $\pm$ 1.5     | 13.5 $\pm$ 1.9             | 13.8    | 54.5 $\pm$ 2.0     | 12.97 $\pm$ 0.47           | 3.7     | 7.31 $\pm$ 0.75                  | 11.6 $\pm$ 1.2             | 10.3    |
| 10080 (7 days)  | 11.4 $\pm$ 1.5     | 13.7 $\pm$ 1.9             | 13.5    | 55.3 $\pm$ 2.1     | 13.17 $\pm$ 0.50           | 3.8     | 7.43 $\pm$ 0.74                  | 11.8 $\pm$ 1.2             | 9.9     |
| 14400 (10 days) | 11.8 $\pm$ 1.6     | 14.2 $\pm$ 1.9             | 13.4    | 56.9 $\pm$ 2.2     | 13.55 $\pm$ 0.51           | 3.8     | 7.65 $\pm$ 0.74                  | 12.1 $\pm$ 1.2             | 9.7     |
| 20160 (14 days) | 12.1 $\pm$ 1.7     | 14.6 $\pm$ 2.0             | 13.9    | 58.4 $\pm$ 2.2     | 13.90 $\pm$ 0.52           | 3.8     | 7.86 $\pm$ 0.75                  | 12.5 $\pm$ 1.2             | 9.6     |
| 30240 (21 days) | 12.4 $\pm$ 1.7     | 14.9 $\pm$ 2.1             | 13.8    | 59.5 $\pm$ 2.3     | 14.17 $\pm$ 0.54           | 3.8     | 8.02 $\pm$ 0.74                  | 12.7 $\pm$ 1.2             | 9.3     |
| 40320 (28 days) | 13.59 $\pm$ 0.19   | 16.35 $\pm$ 0.28           | 1.4     | 61.1 $\pm$ 2.9     | 14.54 $\pm$ 0.69           | 4.7     | 7.93 $\pm$ 0.88                  | 12.6 $\pm$ 1.4             | 11.1    |
| 60480 (42 days) | 13.83 $\pm$ 0.23   | 16.63 $\pm$ 0.28           | 1.7     | 61.5 $\pm$ 2.9     | 14.65 $\pm$ 0.69           | 4.7     | 8.04 $\pm$ 0.87                  | 12.8 $\pm$ 1.4             | 10.9    |
| 76320 (53 days) | 14.04 $\pm$ 0.25   | 16.89 $\pm$ 0.30           | 1.7     | 62.0 $\pm$ 3.0     | 14.76 $\pm$ 0.71           | 4.8     | 8.14 $\pm$ 0.88                  | 12.9 $\pm$ 1.4             | 10.8    |
| 90720 (63 days) | 14.15 $\pm$ 0.30   | 17.02 $\pm$ 0.36           | 2.1     | 62.5 $\pm$ 3.2     | 14.88 $\pm$ 0.75           | 5.1     | 8.30 $\pm$ 0.79                  | 13.2 $\pm$ 1.3             | 9.6     |

\*SD – 3 independently prepared material samples, analyzed in triplicate; CV – variation coefficient

**Table S2.** Results of simulation of AMI release according to OECD guidelines.

|             | PM PLA/PVA-AMI                                |         | PM PLA/PVA-CH-AMI                             |         | PM PLA/PVA-SiO <sub>2</sub> -AMI              |         |
|-------------|-----------------------------------------------|---------|-----------------------------------------------|---------|-----------------------------------------------|---------|
| Time, [min] | (C <sub>tx</sub> /C <sub>0</sub> ) ± SD*, [%] | CV, [%] | (C <sub>tx</sub> /C <sub>0</sub> ) ± SD*, [%] | CV, [%] | (C <sub>tx</sub> /C <sub>0</sub> ) ± SD*, [%] | CV, [%] |
| 60          | 12.07 ± 0.92                                  | 7.6     | 66.0 ± 3.7                                    | 5.6     | 6.9 ± 1.2                                     | 17.6    |
| 120         | 16.4 ± 2.2                                    | 13.7    | 88.2 ± 9.3                                    | 10.6    | 9.91 ± 0.46                                   | 4.6     |
| 180         | 19.0 ± 2.3                                    | 12.1    | 97 ± 13                                       | 12.9    | 11.63 ± 0.16                                  | 1.4     |
| 240         | 20.9 ± 1.9                                    | 0.9     | 103 ± 12                                      | 11.9    | 12.73 ± 0.45                                  | 3.5     |
| 360         | 24.427 ± 0.073                                | 0.3     | 110 ± 14                                      | 12.8    | 14.12 ± 0.78                                  | 5.5     |

\*SD – samples were prepared twice and analyzed in triplicate

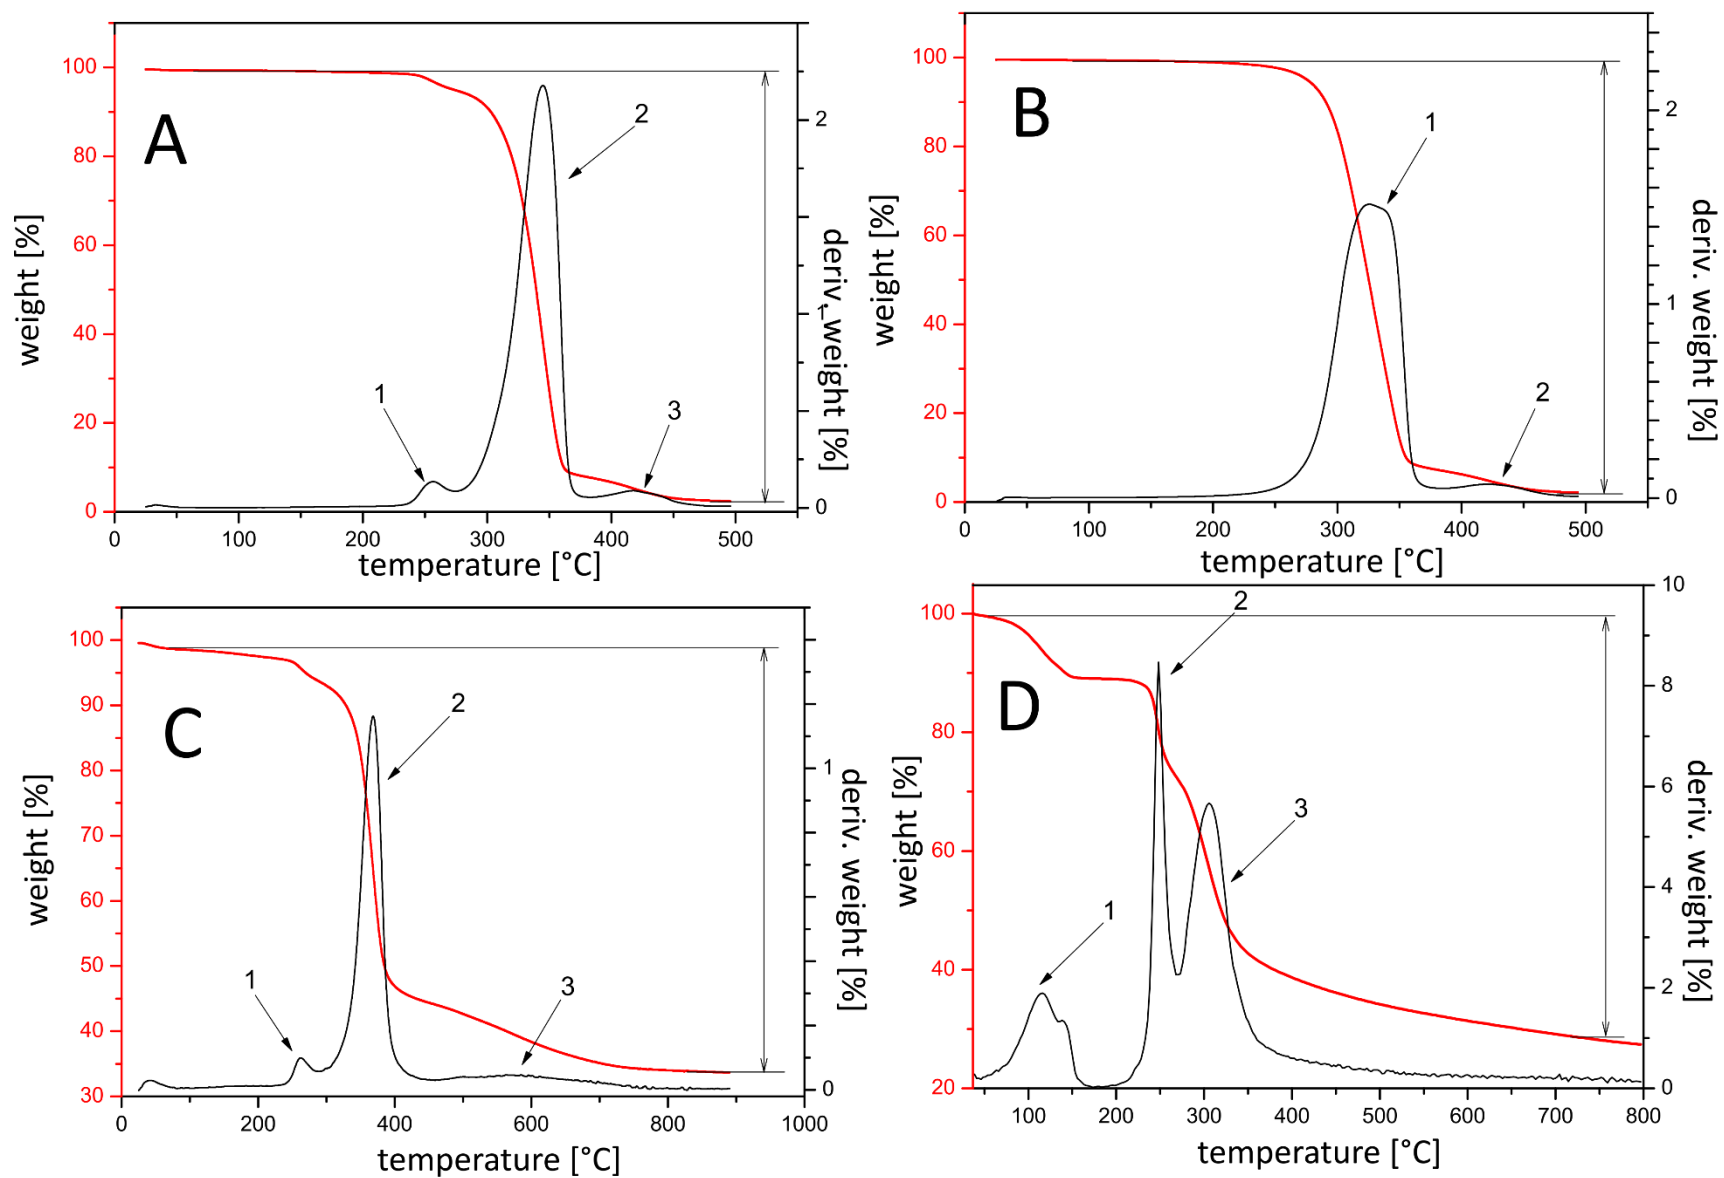

**Figure S3.** Thermogravimetry and differential thermogravimetry curves for the porous matrices of PLA/PVA-AMI (A), PLA/PVA-CH-AMI (B), and PLA /PVA-SiO<sub>2</sub>-AMI (C) and amikacin (D).

**Table S3.** Results of TGA analysis for porous matrices (peak numbers according to Fig. S3).

| Sample            | Peak 1          |                 |                 |            | Peak 2          |                 |                 |            | Peak 3          |                 |                 |            | $\Delta w_{fin}$ | $\Delta T_{5\%}$ ,<br>[°C] | $\Delta T_{10\%}$ ,<br>[°C] | $\Delta T_{50\%}$ ,<br>[°C] |
|-------------------|-----------------|-----------------|-----------------|------------|-----------------|-----------------|-----------------|------------|-----------------|-----------------|-----------------|------------|------------------|----------------------------|-----------------------------|-----------------------------|
|                   | $T_i$ ,<br>[°C] | $T_m$ ,<br>[°C] | $T_f$ ,<br>[°C] | $\Delta w$ | $T_i$ ,<br>[°C] | $T_m$ ,<br>[°C] | $T_f$ ,<br>[°C] | $\Delta w$ | $T_i$ ,<br>[°C] | $T_m$ ,<br>[°C] | $T_f$ ,<br>[°C] | $\Delta w$ |                  |                            |                             |                             |
| PM PLA/PVA-AMI    | 225             | 256             | 277             | 4.0        | 277             | 345             | 375             | 86.5       | 375             | 424             | 457             | 5.3        | 95.8             | 273                        | 303                         | 340                         |
| PM PLA/PVA-CH-AMI | 227             | 326             | 363             | 91.3       | 363             | 423             | 492             | 6.1        | -               | -               | -               | -          | 97.4             | 276                        | 291                         | 325                         |
| PM PLA/PVA-Si-AMI | 243             | 263             | 298             | 4.9        | 298             | 368             | 502             | 50.6       | 502             | 585             | 817             | 8.6        | 64.1             | 269                        | 328                         | 385                         |
| AMI               | 50              | 114             | 170             | 11.0       | 200             | 247             | 275             | 14.0       | 275             | 302             | 500             | 40.0       | 70.0             | 104                        | 137                         | 319                         |

$T_i$  – onset temperature;  $T_m$  – temperature corresponding to maximum mass loss rate;  $T_f$  – final temperature;  $\Delta w$  – mass loss in the range:  $T_i \div T_f$ ;  $\Delta w_{fin}$  – total mass loss;  $\Delta T_{5\%}$ ,  $\Delta T_{10\%}$ ,  $\Delta T_{50\%}$  – temperature corresponding to respectively 5%, 10% and 50% of sample mass loss

*Comment: TGA analysis – brief discussion*

Thermogravimetric analysis (Fig. S3, Table S3) revealed that temperatures corresponding to the maximum rate of loss in mass varied according to the composition of the polymer matrix of the materials; i.e. 345°C for PM PLA/PVA-AMI, 326°C for PM PLA/PVA-CH-AMI, and 368°C for PM PLA/PVA-SiO<sub>2</sub>-AMI. In the literature a slight reduction in mass is reported, from 50°C to ca 150°C, primarily caused by the vaporization of moisture, which is especially visible in the case of AMI (as an API, see Figure S3-D) or other volatile products [64-65]. All the materials studied herein demonstrated loss in mass at approximately 300–400°C, indicating the decomposition of PLA [66]. The wide peak at this region for PM PLA/PVA-CH-AMI also showed partial overlapping of another component with a similar temperature of decomposition (200°C to 360°C), this being chitosan and AMI, see Figure S3 [65,67]. PVA decomposed at 400–450°C, brought about by further degradation of polyene [65]. The peak at ca 250°C could denote the decomposition of AMI. Temperatures corresponding to initial degradation of the materials (the onset temperature for peak 1, Fig. S3) were 225°C and 227°C for PM PLA/PVA-AMI and PM PLA/PVA-CH-AMI, respectively. In the case of PM PLA/PVA-AMI, the loss in mass observed during the first stage of measurement (see Fig. S3, peak 1) was 4% w/w, and the highest value was seen for PM PLA/PVA-CH-AMI (90.3% w/w). It was found that the initial onset temperature was the highest (243°C) for PM PLA/PVA-SiO<sub>2</sub>-AMI, as a consequence of adding the silica. For PM PLA/PVA-AMI, the first peak indicated loss in mass equal to 4.9% w/w. The lowest such loss was observed for PM PLA/PVA-SiO<sub>2</sub>-AMI (50.6% w/w) in comparison to the other materials, caused by the presence of the silica (the melting point of which is above 1400°C). The peak at 585°C for PM PLA/PVA-SiO<sub>2</sub>-AMI (Fig. S3, peak 3) suggested partial phase conversion of the silica had taken place (quartz  $\beta$  > 573°C); loss in mass at this temperature was 8.6% w/w. Table S3 summarizes the values of  $\Delta T_{5\%}$ ,  $\Delta T_{10\%}$ , and  $\Delta T_{50\%}$ , corresponding to the temperatures at which 5%, 10%, and 50% of loss in mass of the samples had occurred, respectively. The materials were similar in terms of the temperature at which 5% loss in mass happened (269–276°C). It is worthy of note that PM PLA/PVA-SiO<sub>2</sub>-AMI showed the greatest thermal stability, and the highest temperatures were discerned for it at which 10% and 50% of loss in mass of the sample were recorded
